# Supplementary material for: Biological and Cheminformatics Studies of Newly Designed Triazole Based Derivatives as Potent Inhibitors against Mushroom Tyrosinase
Source: MDPI journal article supplement (doi:10.3390/molecules27051731), 2022-03-07
Supplement: s1 [file s1]

## Supporting Information

### **Biological and cheminformatics studies of newly designed tri-azole based derivatives as potent inhibitors against mushroom tyrosinase**

Mubashir Hassan<sup>1,2</sup>, Balasaheb D. Vanjare<sup>3</sup>, Kyou-Yeong Sim<sup>3</sup>, Hussain Raza<sup>4</sup>, Ki Hwan Lee<sup>3\*</sup>, Saba Shahzadi<sup>5</sup>, Andrzej Kloczkowski<sup>2,6\*</sup>

<sup>1</sup> Institute of Molecular Biology and Biotechnology, The University of Lahore-54590, Pakistan

<sup>2</sup> Battelle Center for Mathematical Medicine, The Research Institute at Nationwide Children's Hospital, Columbus, Ohio 43205, USA.

<sup>3</sup> Department of Chemistry, Kongju National University, Gongju, Chungnam-do 32588, Republic of Korea.

<sup>4</sup> Department of Biological Science, Kongju National University, Gongju, Chungnam-do 32588, Republic of Korea.

<sup>5</sup> Institute of Molecular Sciences and Bioinformatics, Nesbit Road Lahore, Pakistan

<sup>6</sup> Department of Pediatrics, The Ohio State University, Columbus, Ohio 43205, USA

#### **Corresponding Authors:**

**Prof. Andrzej Kloczkowski,**

Battelle Center for Mathematical Medicine, The Research Institute at Nationwide Children's Hospital, Columbus, Ohio 43205, USA. Email: [Andrzej.Kloczkowski@nationwidechildrens.org](mailto:Andrzej.Kloczkowski@nationwidechildrens.org)

**Dr. Ki Hwan Lee,**

Dept. of Chemistry, Kongju National University, Gongju, Chungnam do 32588, Republic of Korea. Email: [khlee@kongju.ac.kr](mailto:khlee@kongju.ac.kr)

**Supporting Figure captions:**

**Figure S1, ES<sup>+</sup>: <sup>1</sup>H NMR Spectrum of 9a**

**Figure S2, ES<sup>+</sup>: <sup>13</sup>C NMR Spectrum of 9a**

**Figure S3, ES<sup>+</sup>: IR Spectrum of 9a**

**Figure S4, ES<sup>+</sup>: LCMS Spectrum of 9a**

**Figure S5, ES<sup>+</sup>: <sup>1</sup>H NMR Spectrum of 9b**

**Figure S6, ES<sup>+</sup>: <sup>13</sup>C NMR Spectrum of 9b**

**Figure S7, ES<sup>+</sup>: IR Spectrum of 9b**

**Figure S8, ES<sup>+</sup>: LCMS Spectrum of 9b**

**Figure S9, ES<sup>+</sup>: <sup>1</sup>H NMR Spectrum of 9c**

**Figure S10, ES<sup>+</sup>: <sup>13</sup>C NMR Spectrum of 9c**

**Figure S11, ES<sup>+</sup>: IR Spectrum of 9c**

**Figure S12, ES<sup>+</sup>: LCMS Spectrum of 9c**

**Figure S13, ES<sup>+</sup>: <sup>1</sup>H NMR Spectrum of 9d**

**Figure S14, ES<sup>+</sup>: <sup>13</sup>C NMR Spectrum of 9d**

**Figure S15, ES<sup>+</sup>: IR Spectrum of 9d**

**Figure S16, ES<sup>+</sup>: LCMS Spectrum of 9d**

**Figure S17, ES<sup>+</sup>: <sup>1</sup>H NMR Spectrum of 9e**

**Figure S18, ES<sup>+</sup>: <sup>13</sup>C NMR Spectrum of 9e**

**Figure S19, ES<sup>+</sup>: IR Spectrum of 9e**

**Figure S20, ES<sup>+</sup>: LCMS Spectrum of 9e**

**Figure S21, ES<sup>+</sup>: <sup>1</sup>H NMR Spectrum of 9f**

**Figure S22, ES<sup>+</sup>: <sup>13</sup>C NMR Spectrum of 9f**

**Figure S23, ES<sup>+</sup>: IR Spectrum of 9f**

**Figure S24, ES<sup>+</sup>: LCMS Spectrum of 9f**

**Figure S25, ES<sup>+</sup>: <sup>1</sup>H NMR Spectrum of 9g**

**Figure S26, ES<sup>+</sup>: <sup>13</sup>C NMR Spectrum of 9g**

**Figure S27, ES<sup>+</sup>: IR Spectrum of 9g**

**Figure S28, ES<sup>+</sup>: LCMS Spectrum of 9g**

**Figure S29, ES<sup>+</sup>: <sup>1</sup>H NMR Spectrum of 9h**

**Figure S30, ES<sup>+</sup>: <sup>13</sup>C NMR Spectrum of 9h**

**Figure S31, ES<sup>+</sup>: IR Spectrum of 9h**

**Figure S32, ES<sup>+</sup>: LCMS Spectrum of 9h**

**Figure S33, ES<sup>+</sup>: <sup>1</sup>H NMR Spectrum of 9i**

**Figure S34, ES<sup>+</sup>: <sup>13</sup>C NMR Spectrum of 9i**

**Figure S35, ES<sup>+</sup>: IR Spectrum of 9i**

**Figure S36, ES<sup>+</sup>: LCMS Spectrum of 9i**

**Figure S37, ES<sup>+</sup>:** The Mushroom tyrosinase Ramachandran graph is presented the residual position in the favor region (pink boundary) by evaluating the Psi ( $\phi$ ) and Phi ( $\psi$ ) angles. Most of residues (green circle) lie in favor region while only ten poor rotamers are present in the outer region.

**Figure S38, ES<sup>+</sup>:** Docking image of **9a** against mushroom tyrosinase

**Figure S39, ES<sup>+</sup>:** Docking image of **9b** against mushroom tyrosinase

**Figure S40, ES<sup>+</sup>:** Docking image of **9c** against mushroom tyrosinase

**Figure S41, ES<sup>+</sup>**: Docking image of **9d** against mushroom tyrosinase

**Figure S42, ES<sup>+</sup>**: Docking image of **9e** against mushroom tyrosinase

**Figure S43, ES<sup>+</sup>**: Docking image of **9f** against mushroom tyrosinase

**Figure S44, ES<sup>+</sup>**: Docking image of **9g** against mushroom tyrosinase

**Figure S45, ES<sup>+</sup>**: Docking image of **9h** against mushroom tyrosinase

**Figure S46, ES<sup>+</sup>**: Docking image of **9i** against mushroom tyrosinase

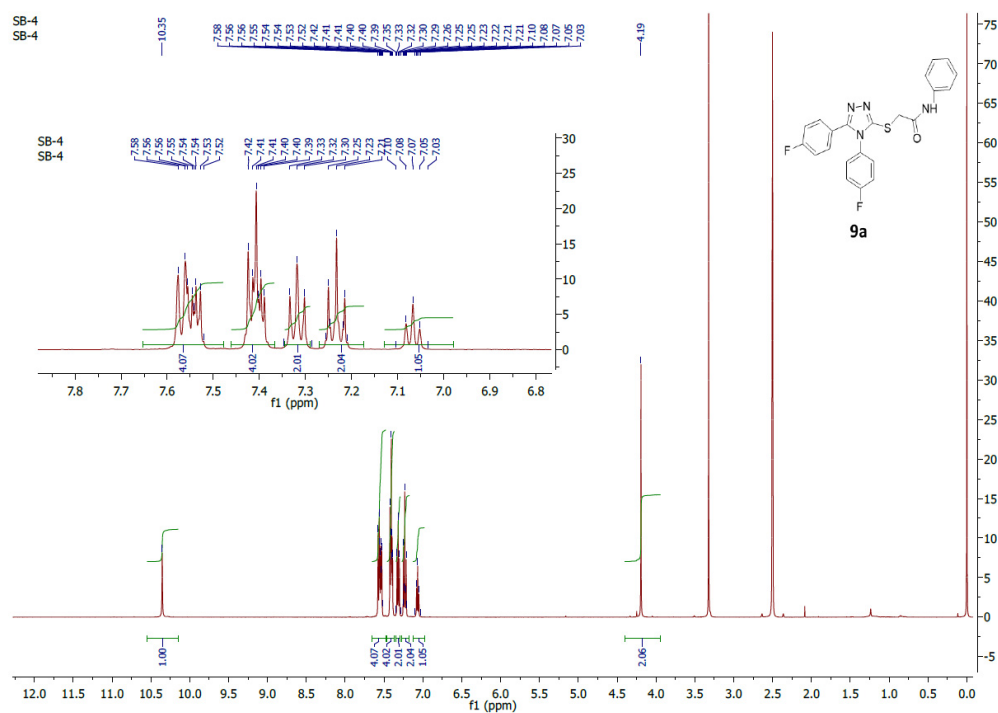

**Figure S1, ES<sup>+</sup>**

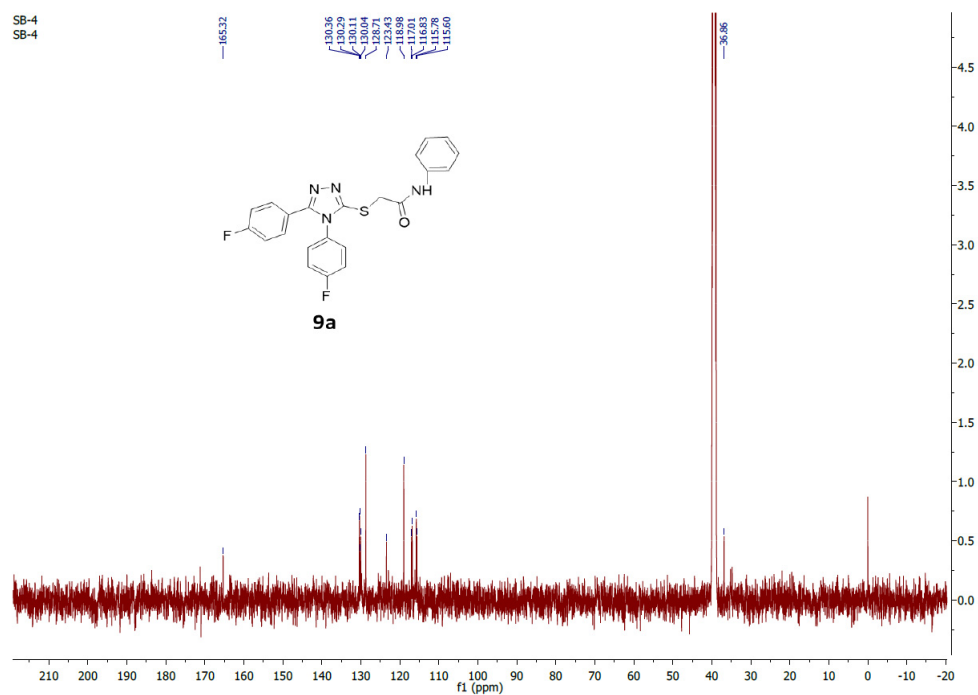

Figure S2, ES†

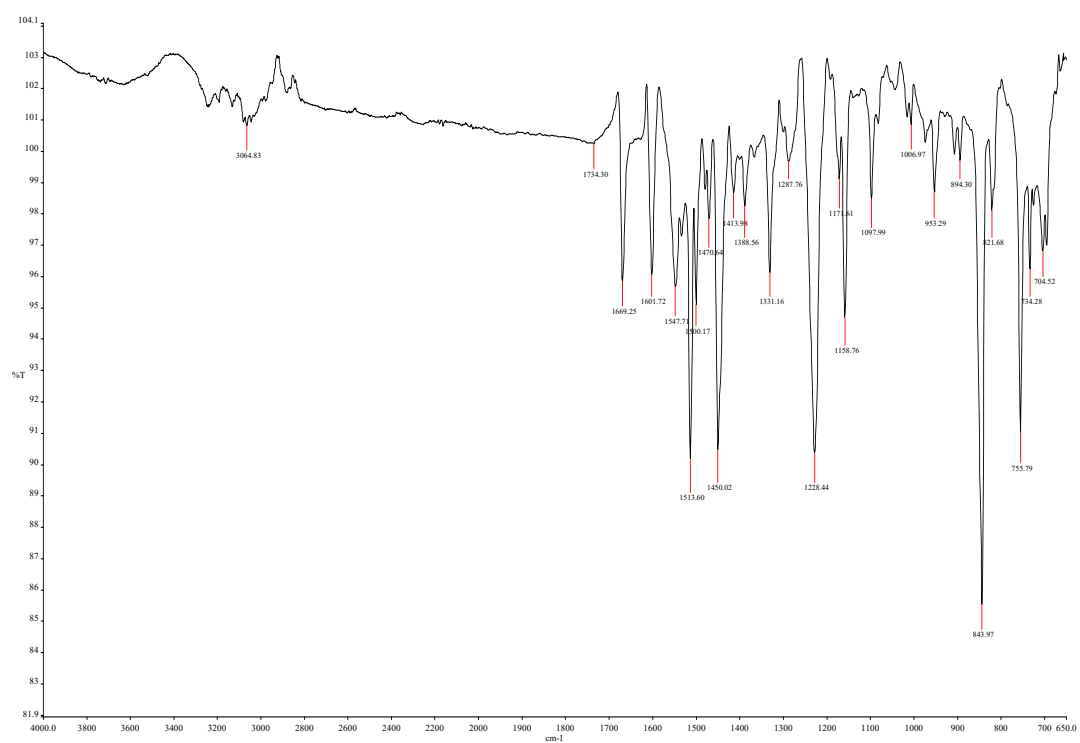

Figure S3, ES<sup>+</sup>

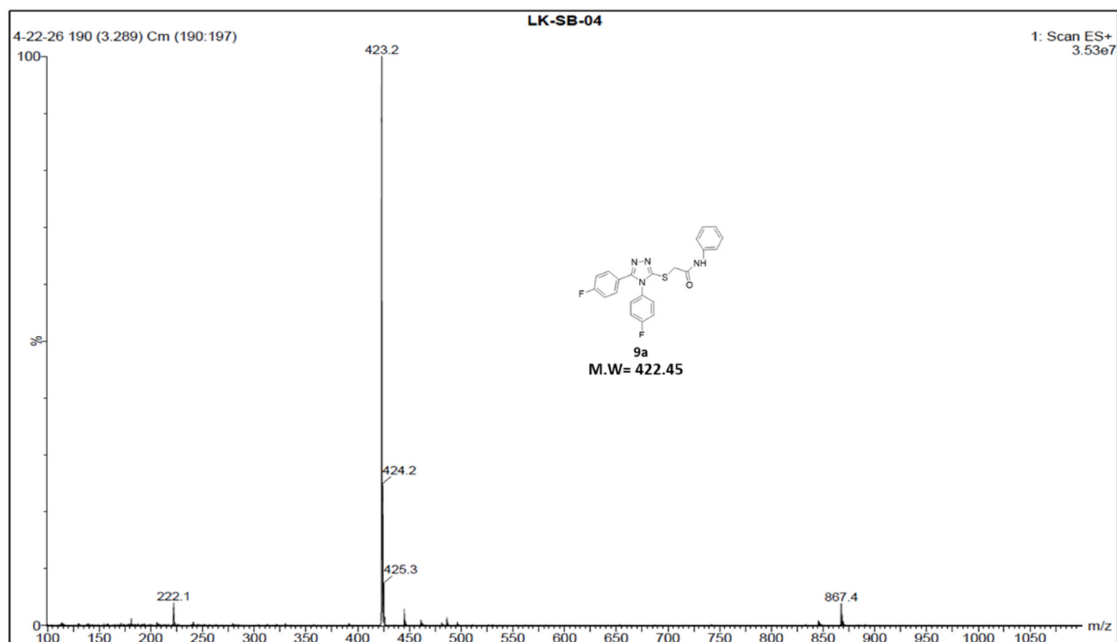

Figure S4, ES<sup>+</sup>

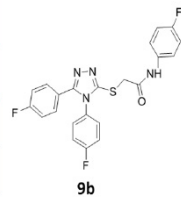

**Figure S5, ES†**

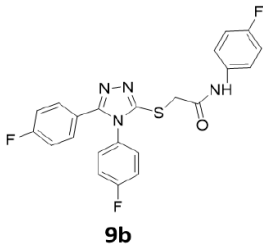

**Figure S6, ES†**

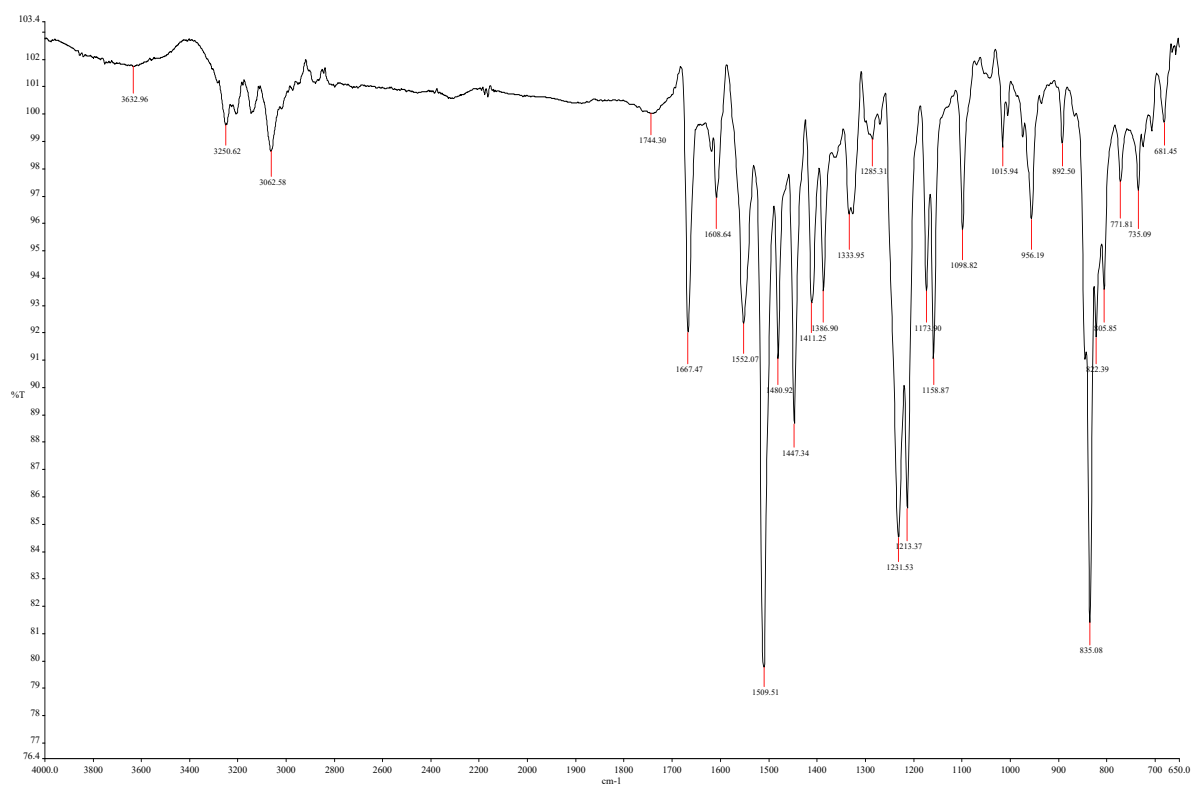

Figure S7, ES†

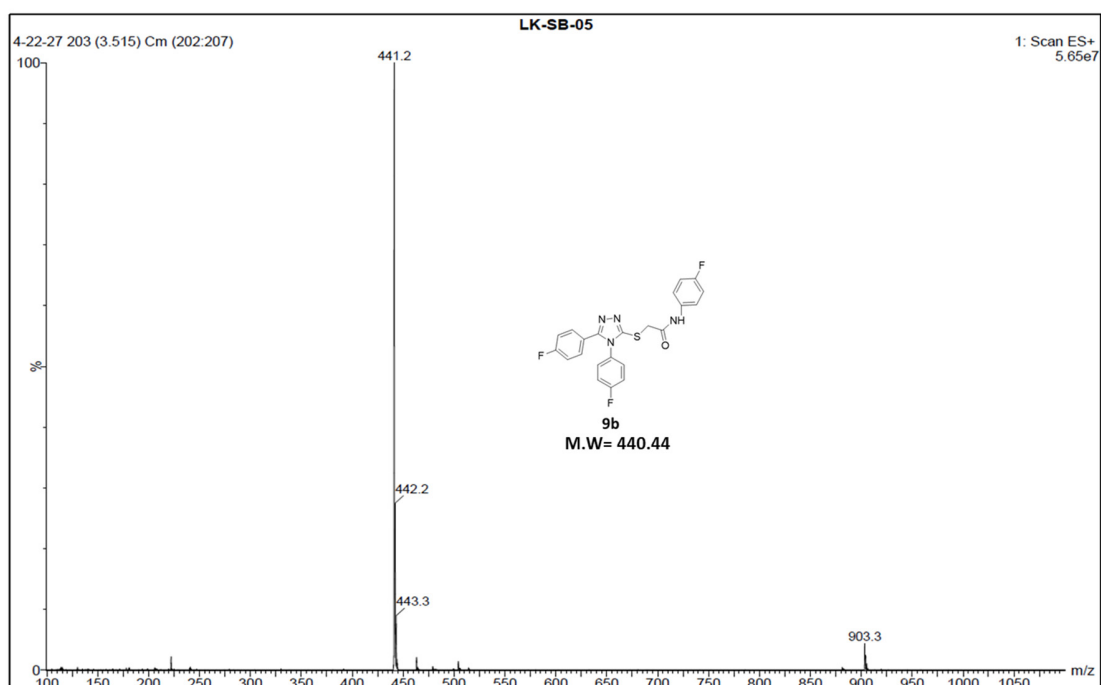



Figure S8, ES†

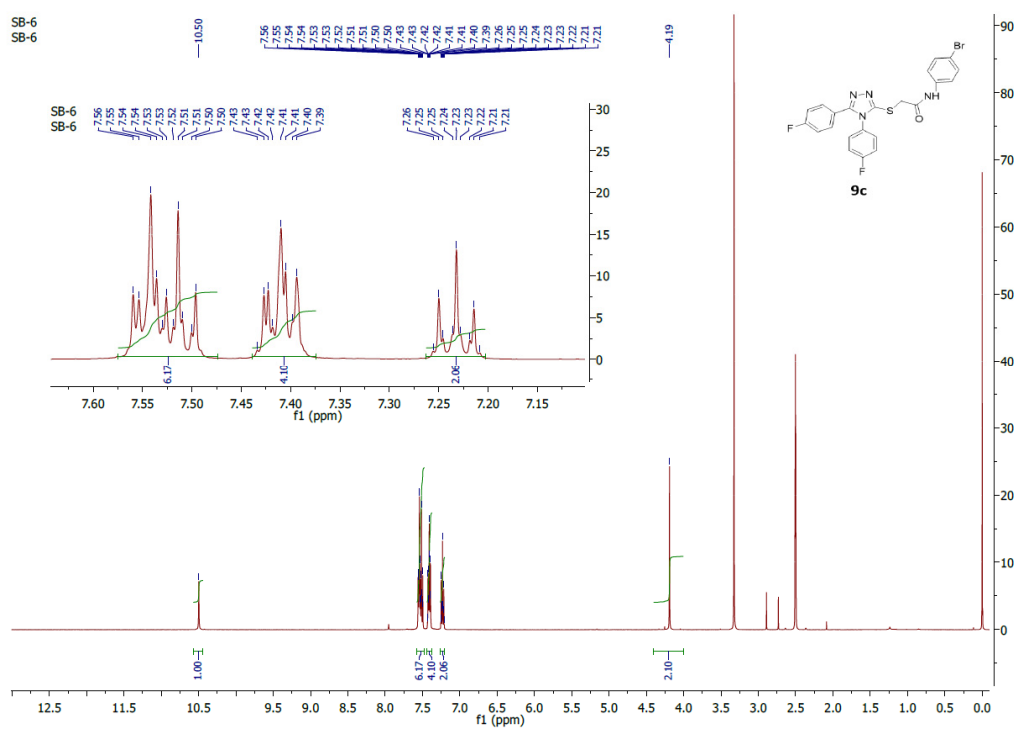

Figure S9, ES†

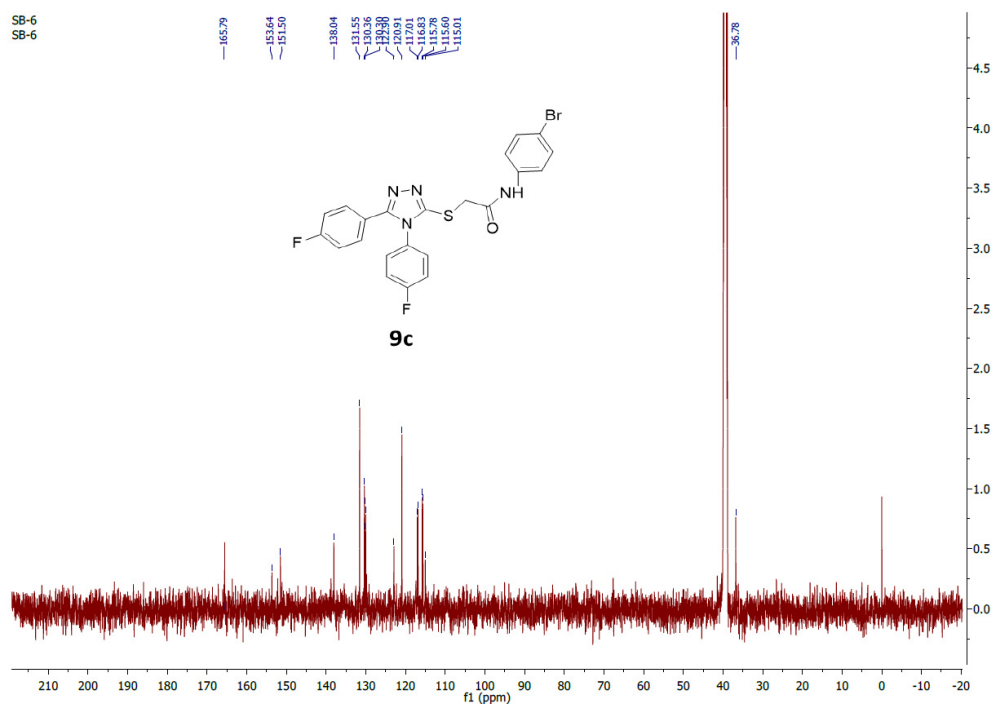

Figure S10, ES†

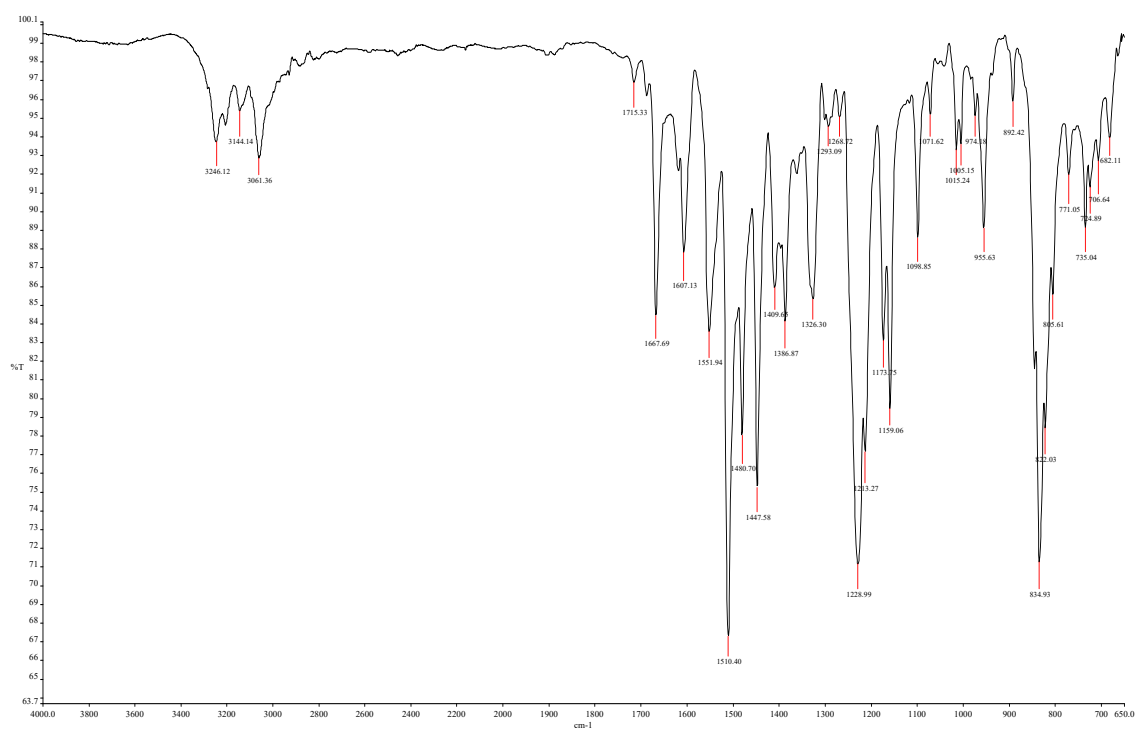

Figure S11, ES†

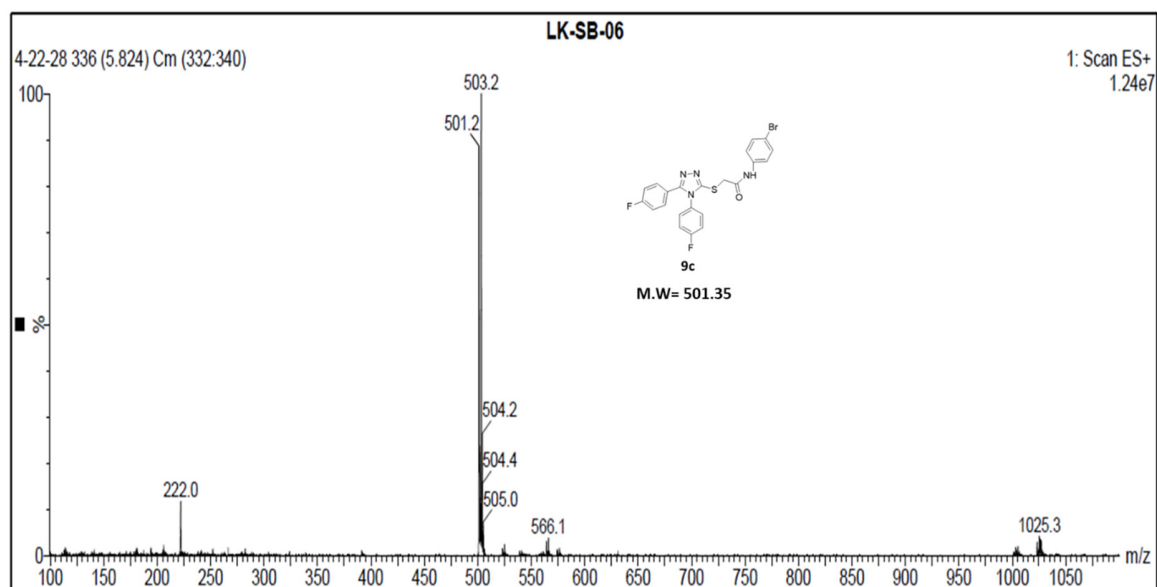

**Figure S12, ES<sup>+</sup>**

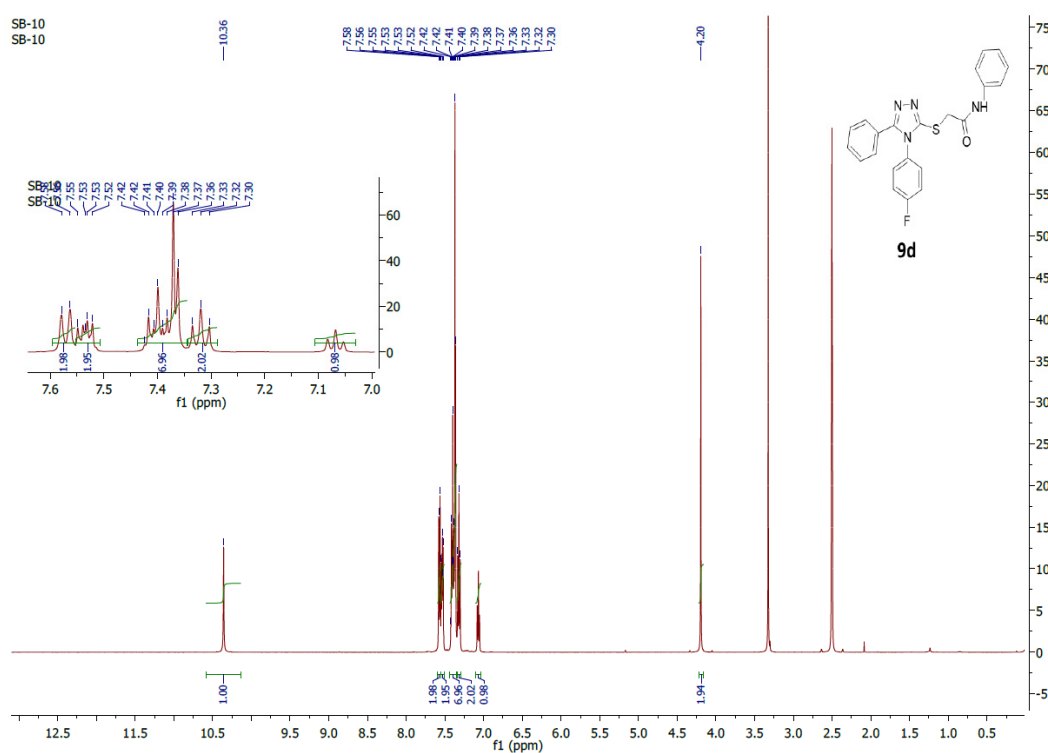

**Figure S13, ES<sup>+</sup>**

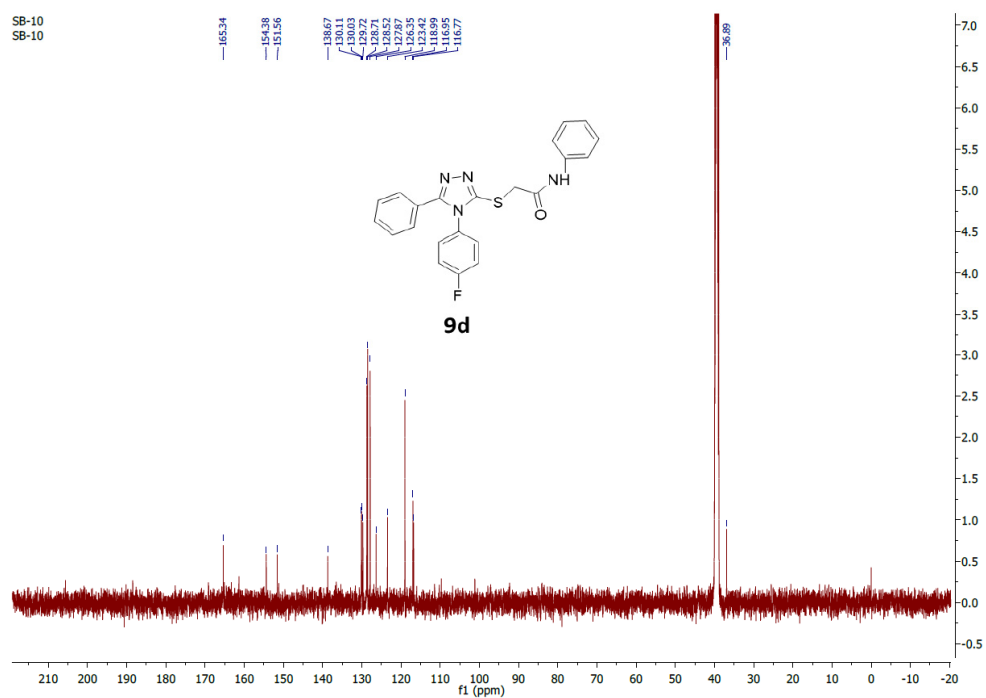

Figure S14, ES†

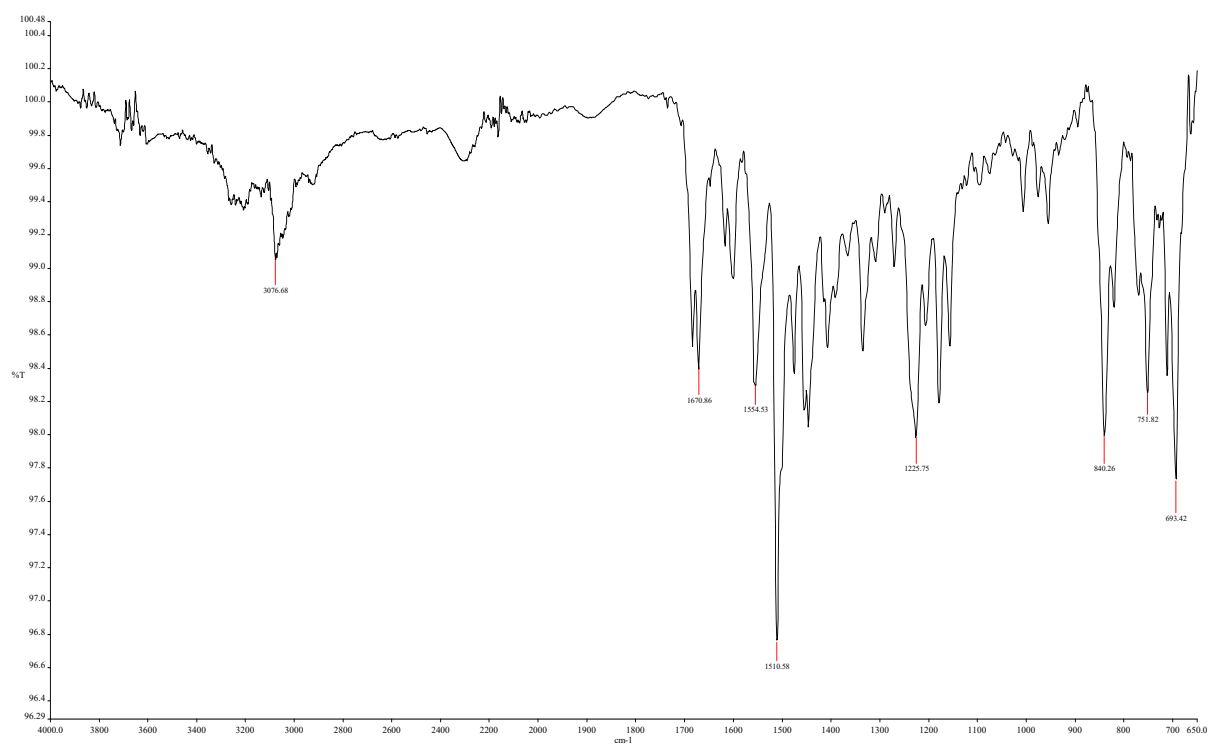

Figure S15, ES<sup>+</sup>

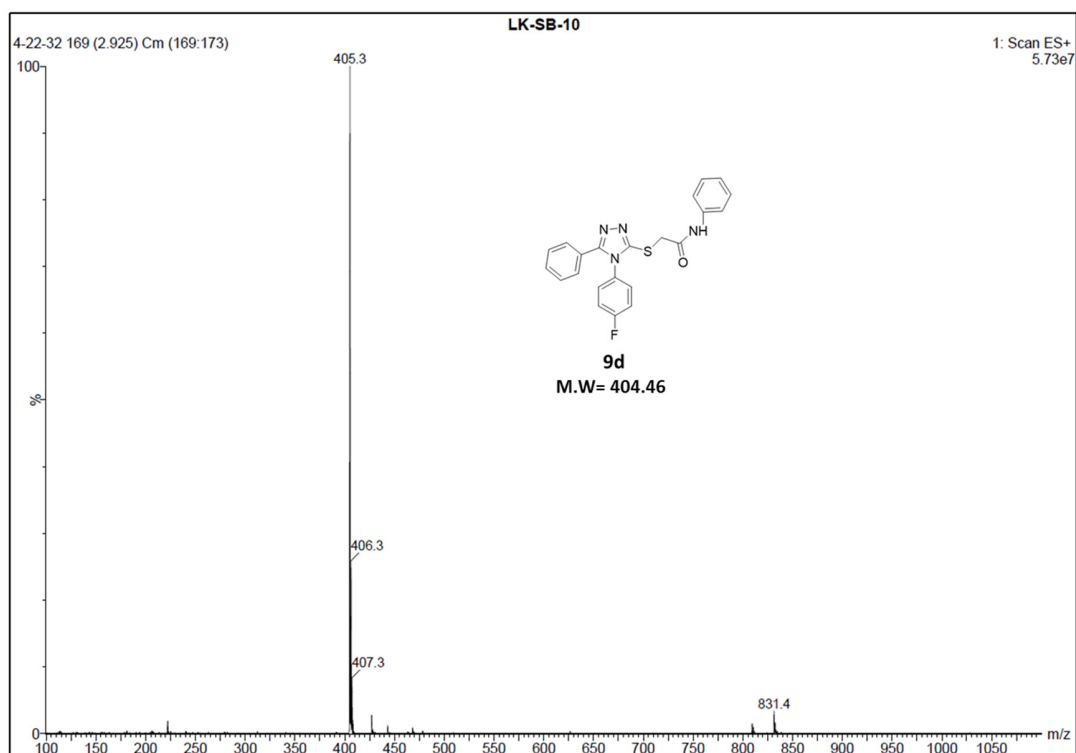

Figure S16, ES<sup>+</sup>

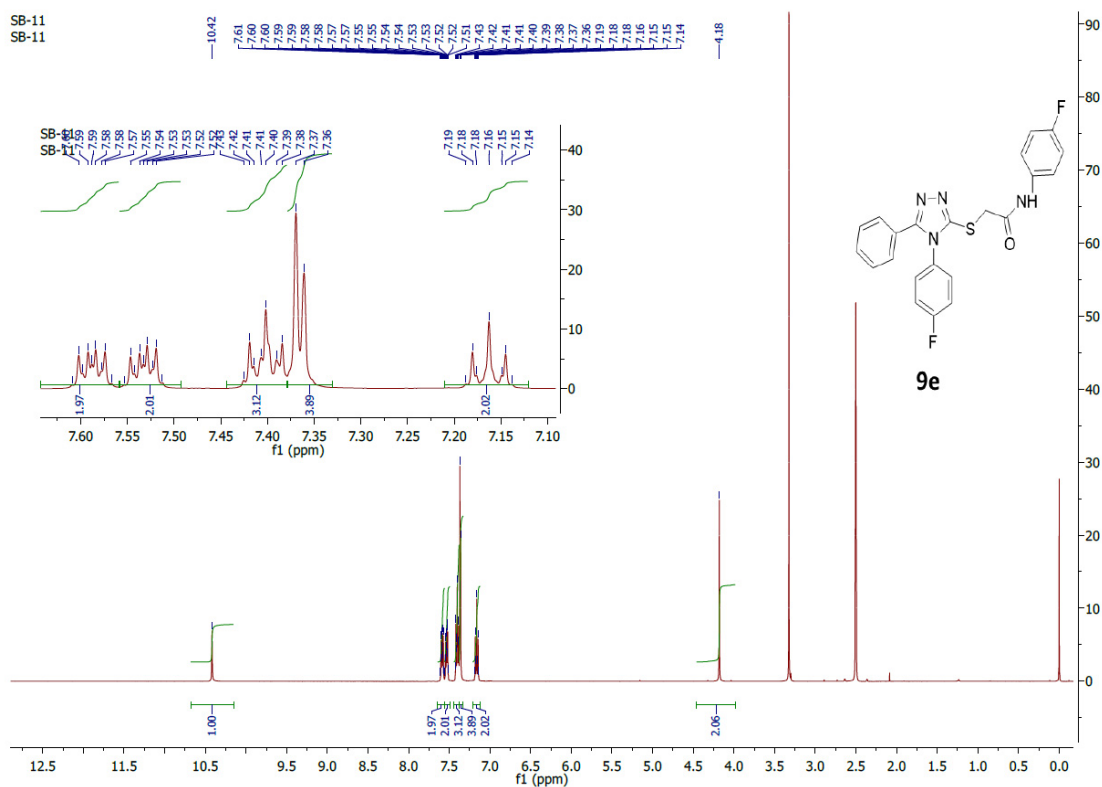

Figure S17, ES†

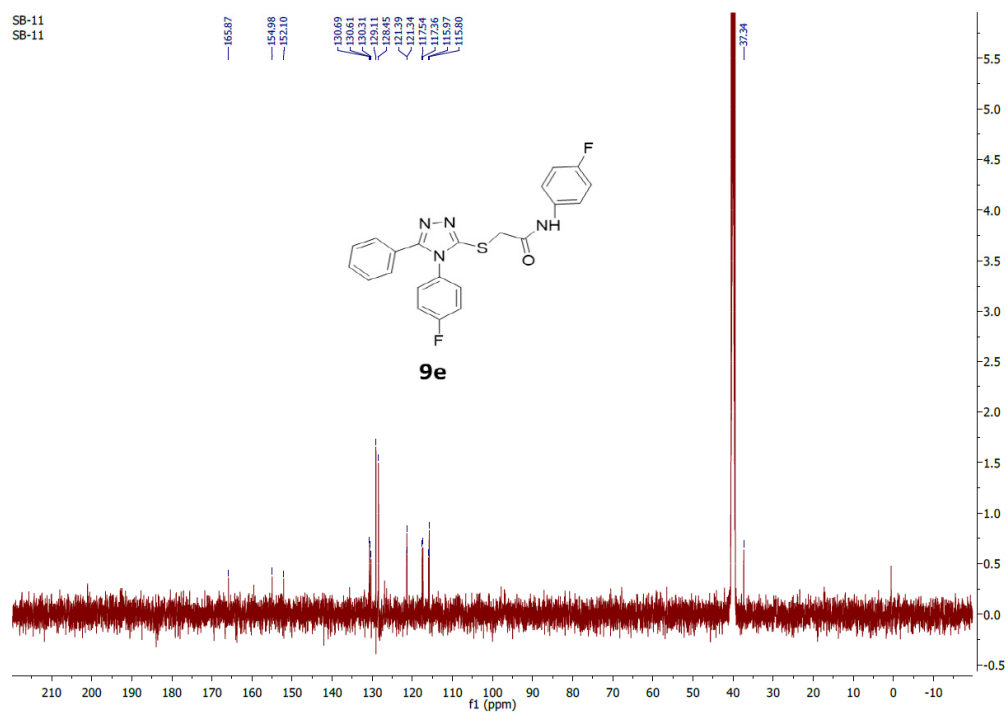

**Figure S18, ES<sup>+</sup>**

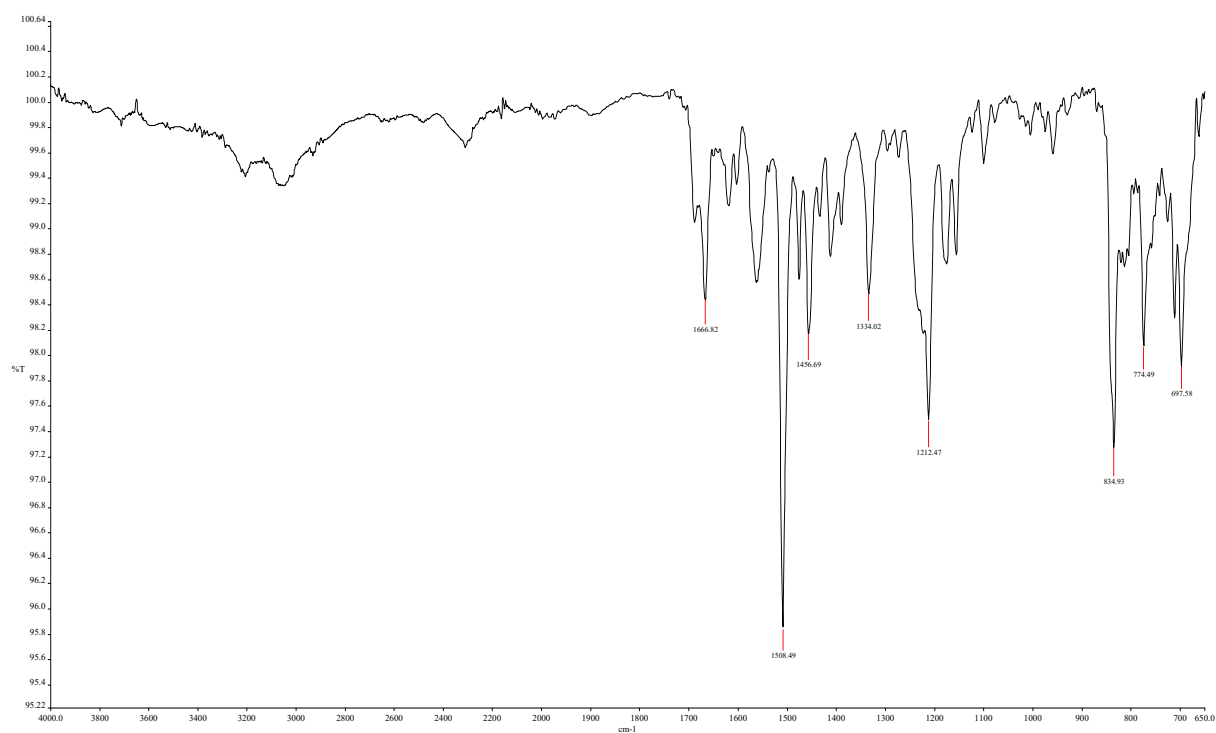

**Figure S19, ES<sup>+</sup>**

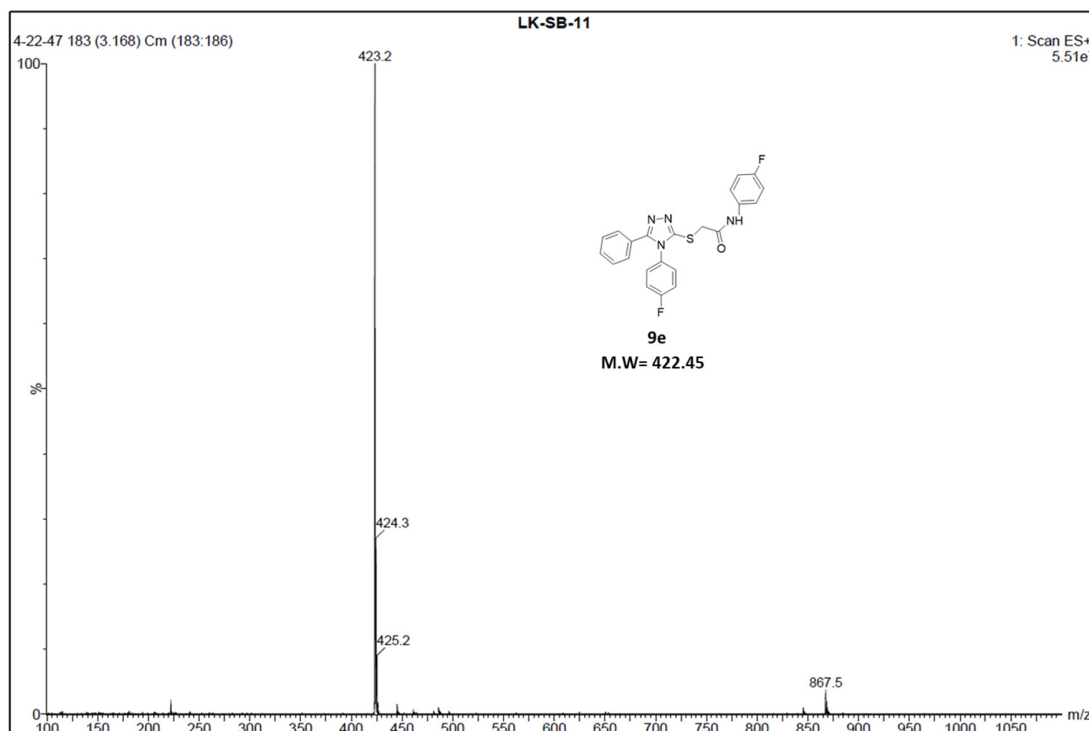

Figure S20, ES†

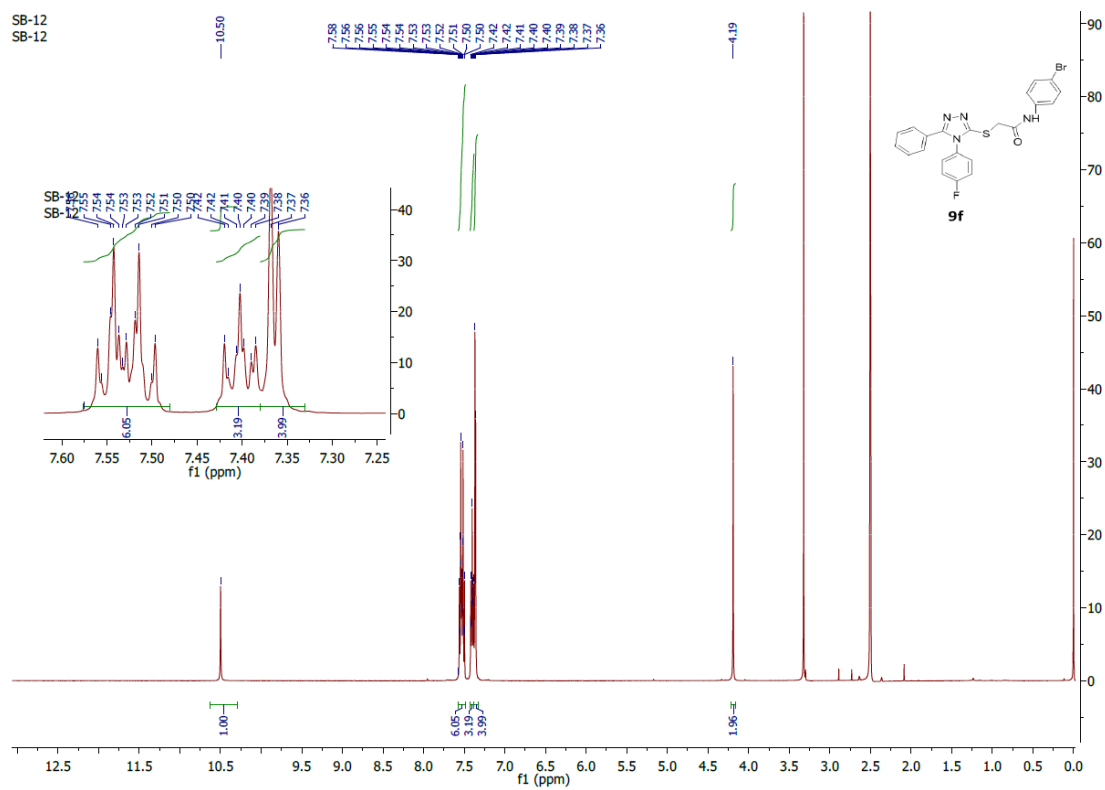

Figure S21, ES†



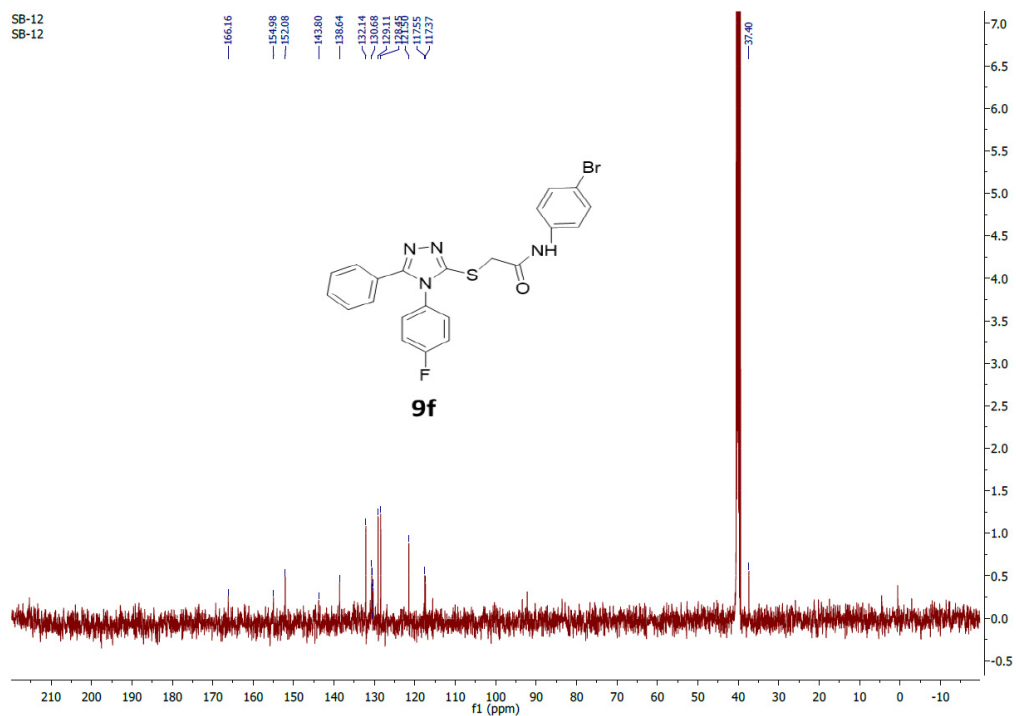

Figure S22, ES<sup>+</sup>

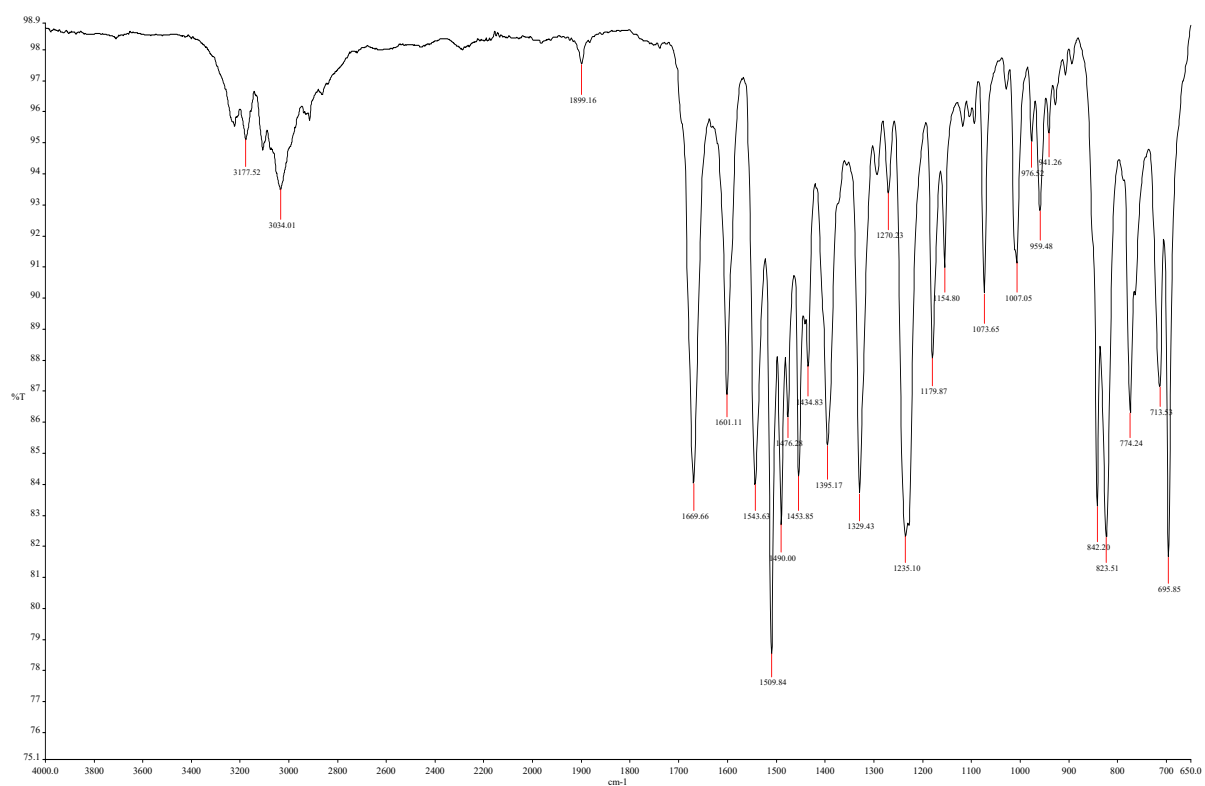

Figure S23, ES<sup>+</sup>

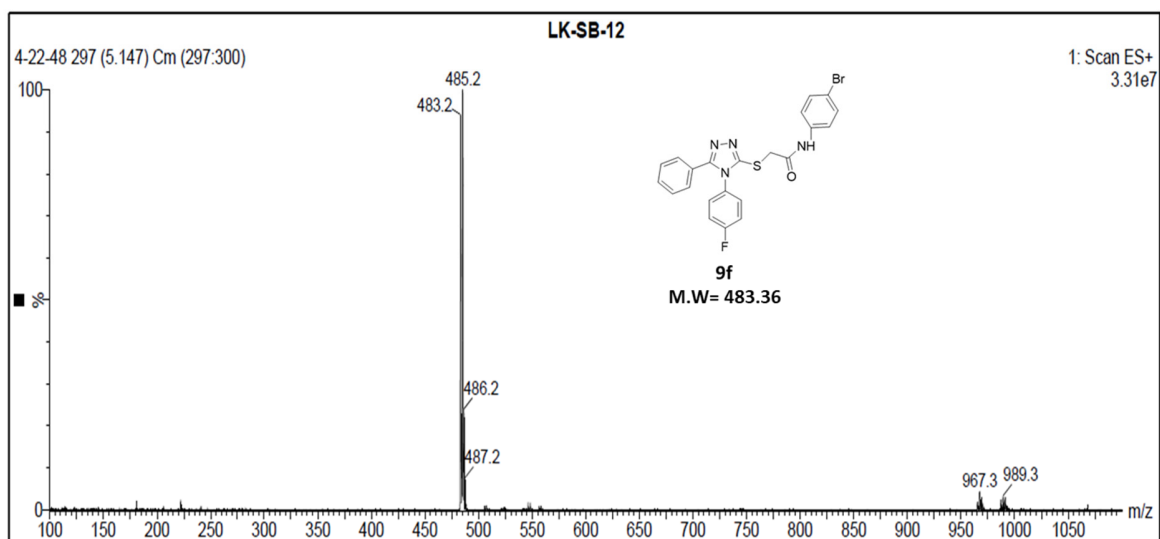

Figure S24, ES<sup>+</sup>

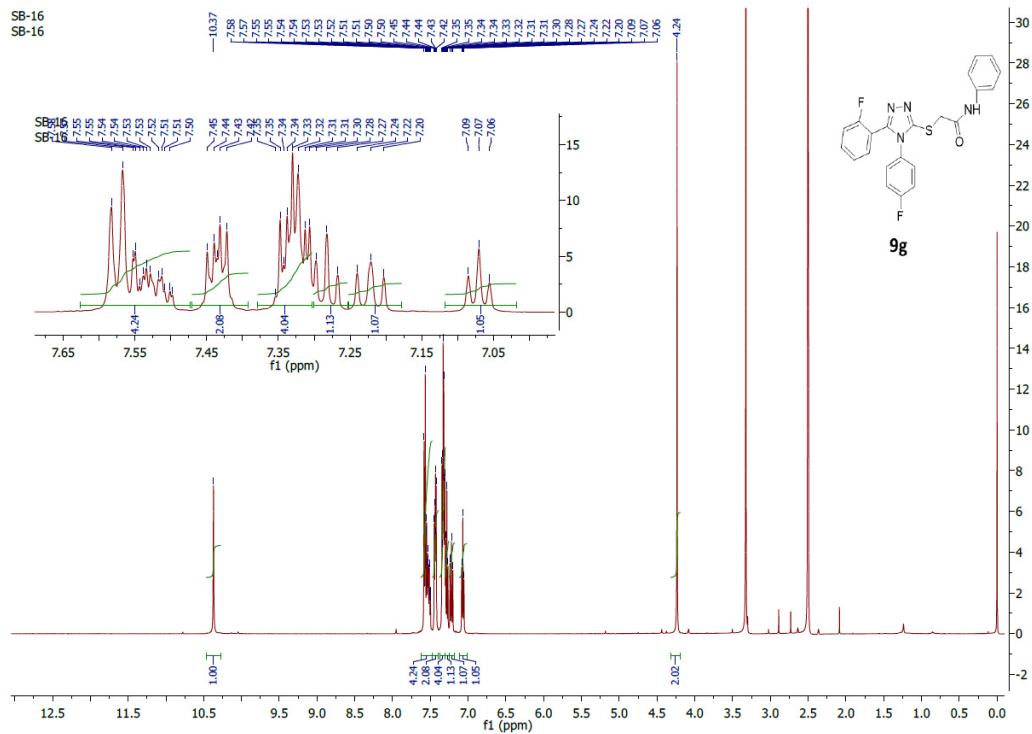

Figure S25, ES<sup>+</sup>

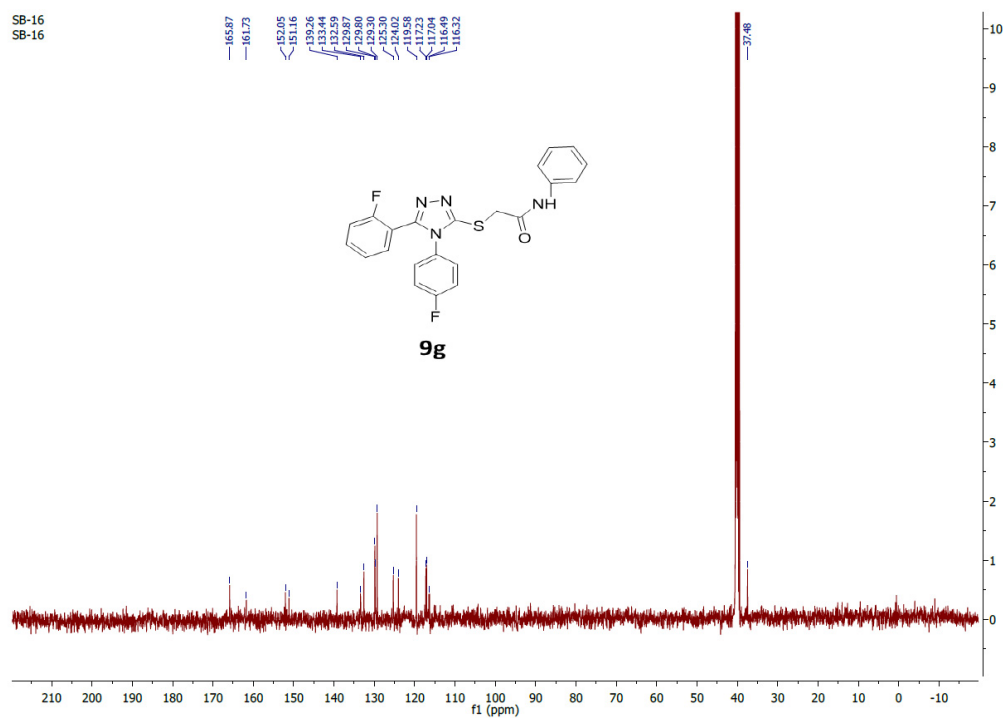

Figure S26, ES†

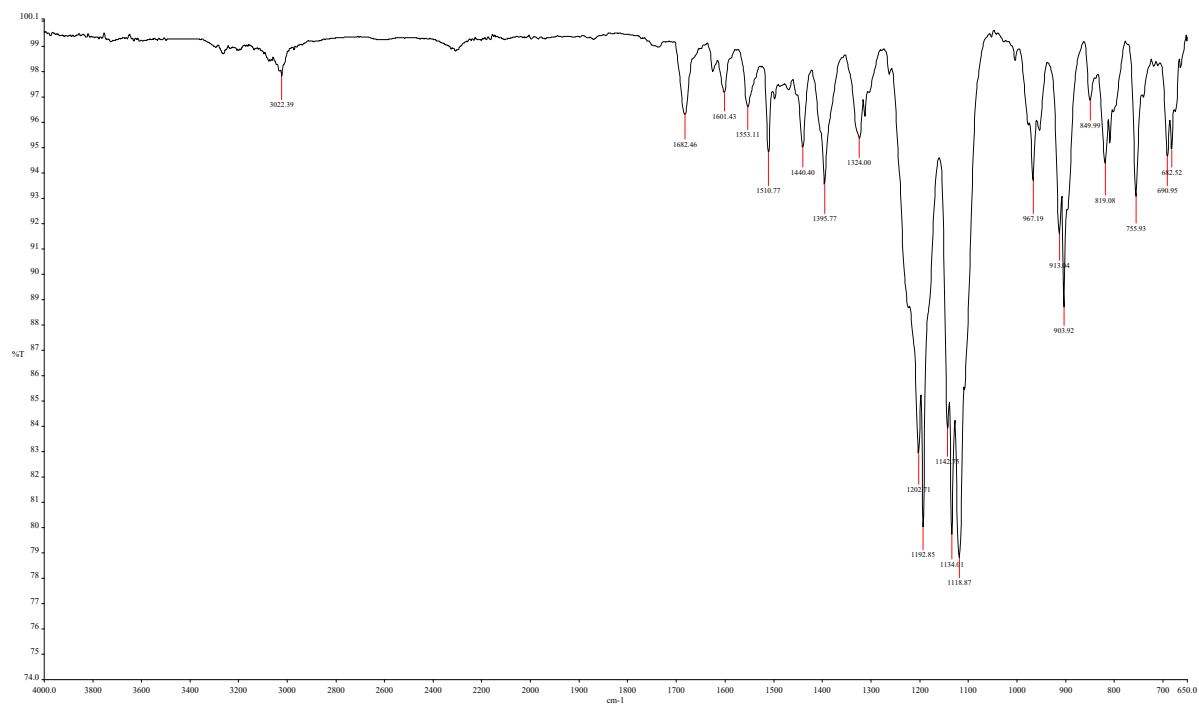

**Figure S27, ES<sup>+</sup>**

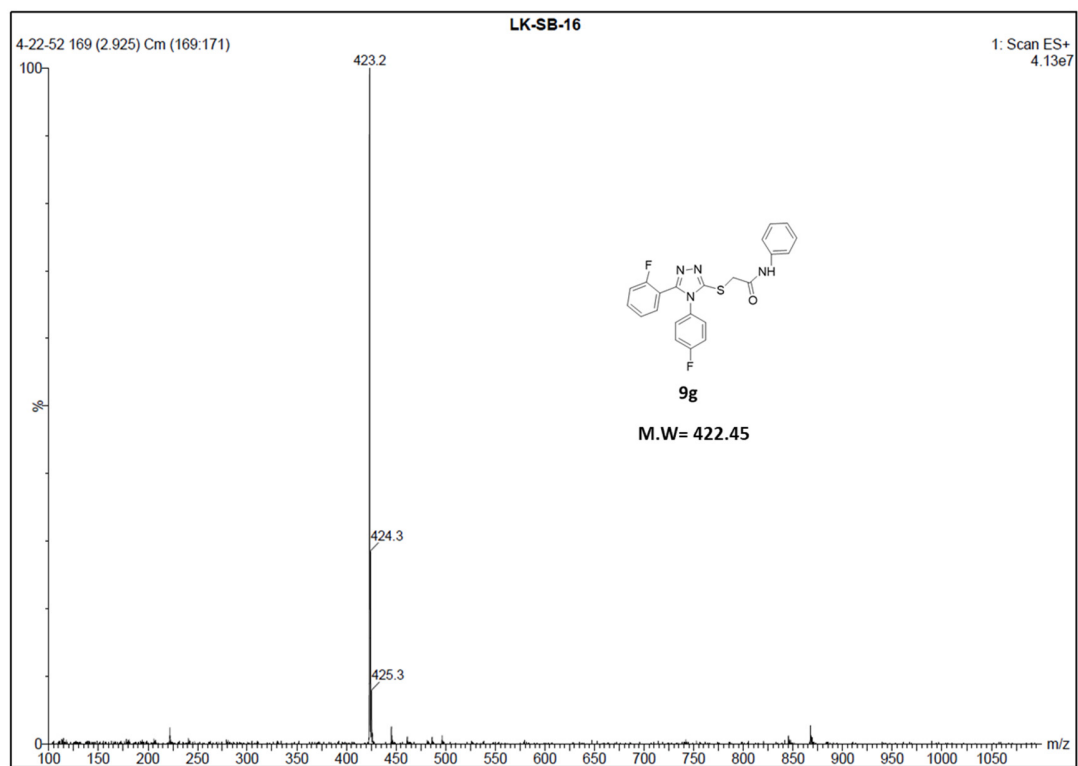

**Figure S28, ES<sup>+</sup>**

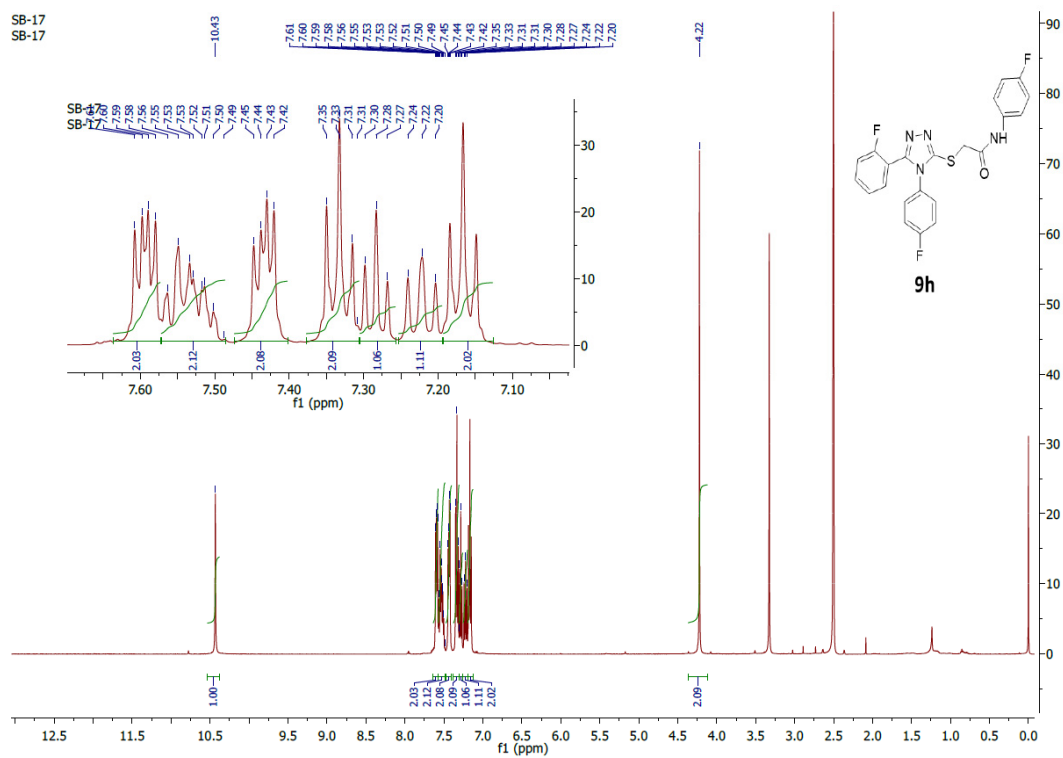

Figure S29, ES†

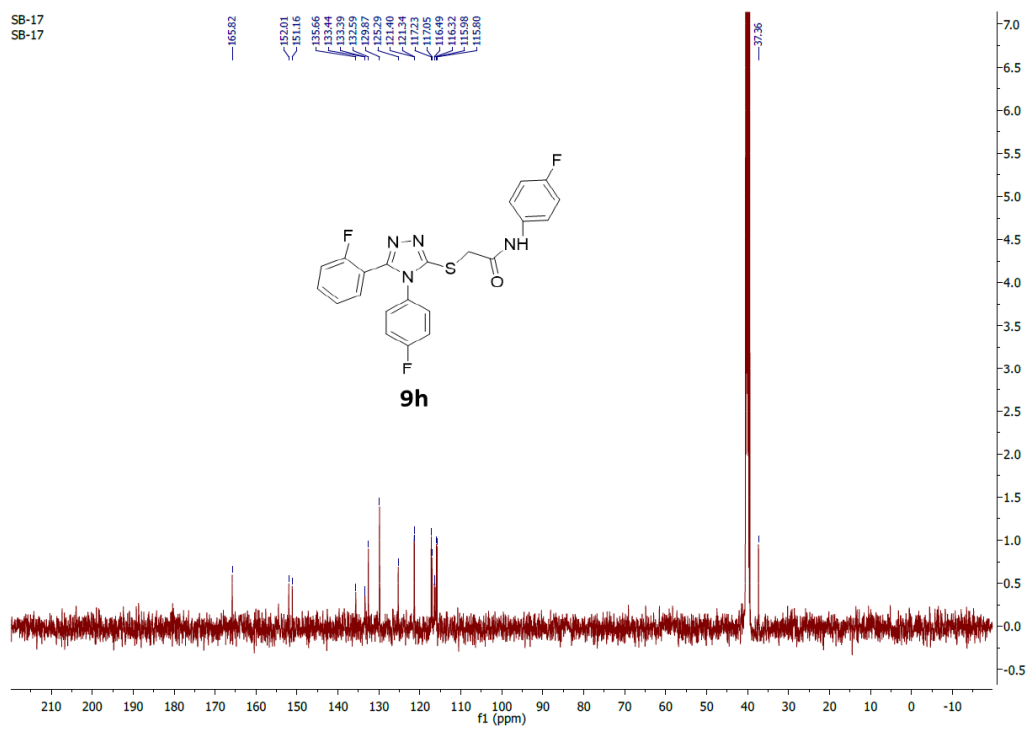

Figure S30, ES<sup>+</sup>

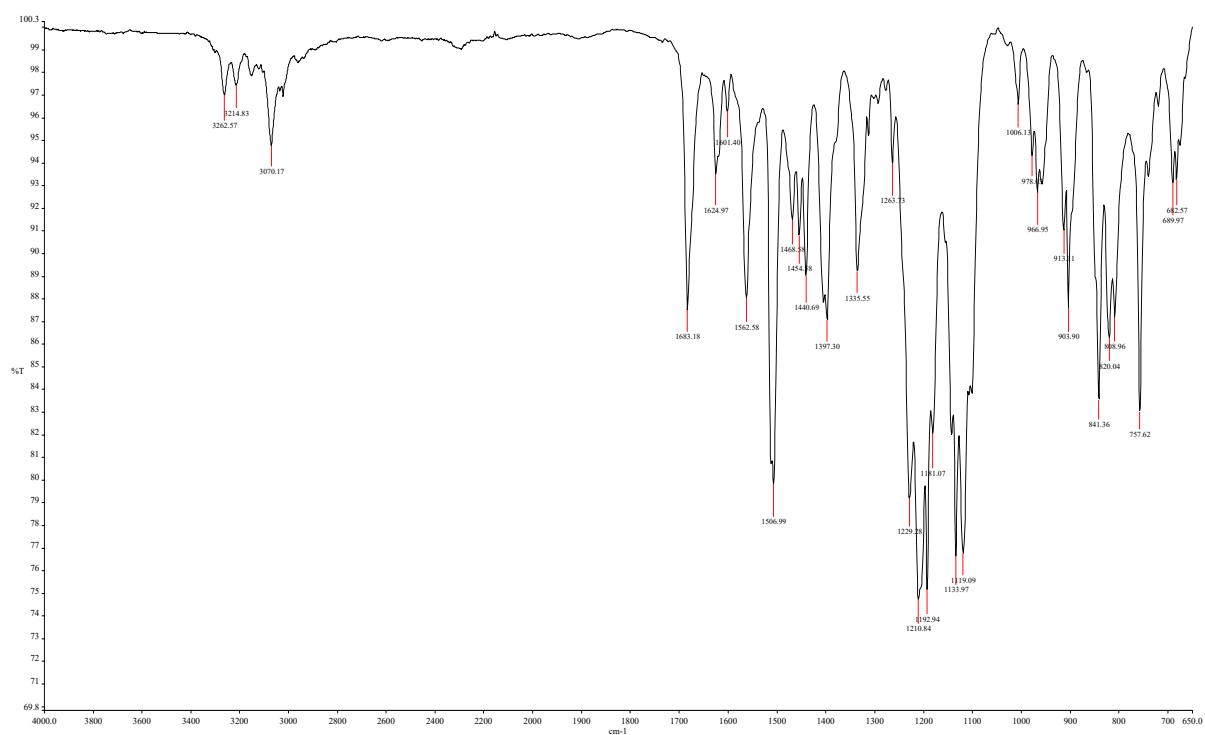

Figure S31, ES<sup>+</sup>

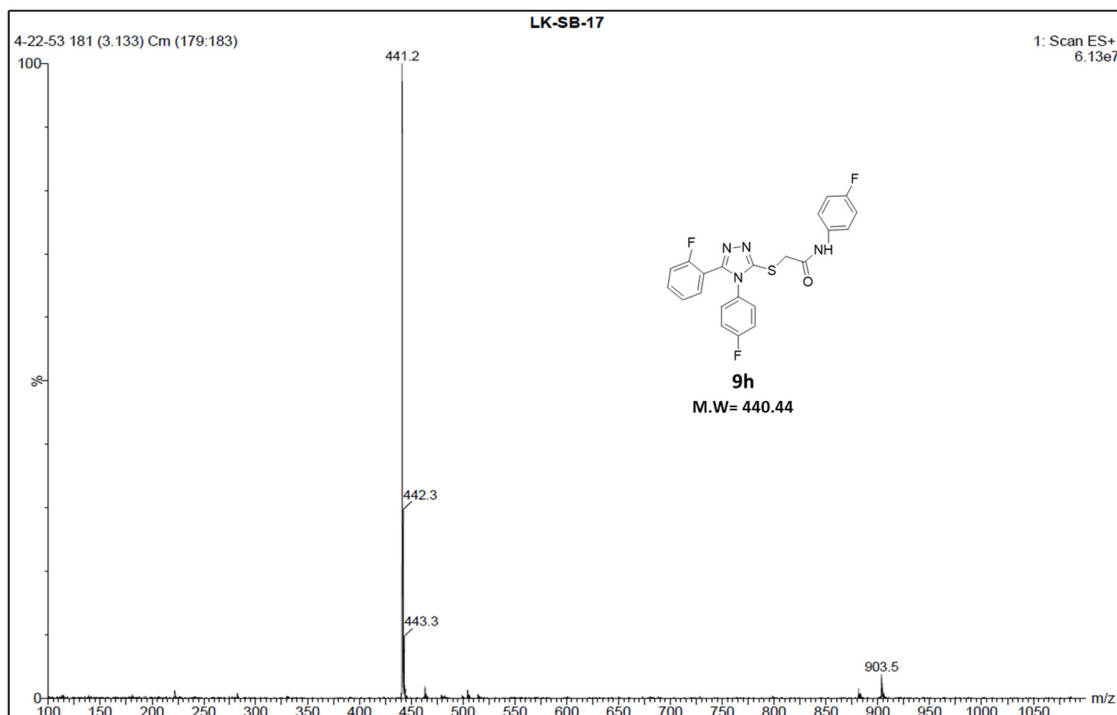

Figure S32, ES†

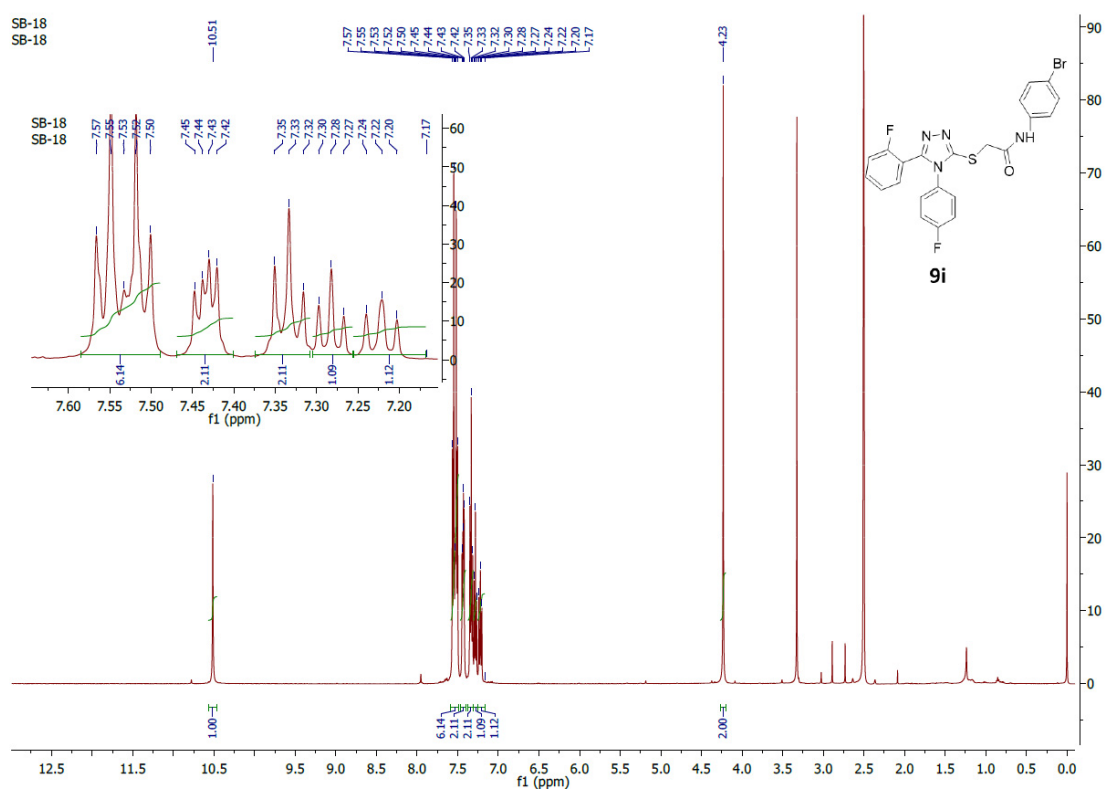

Figure S33, ES†

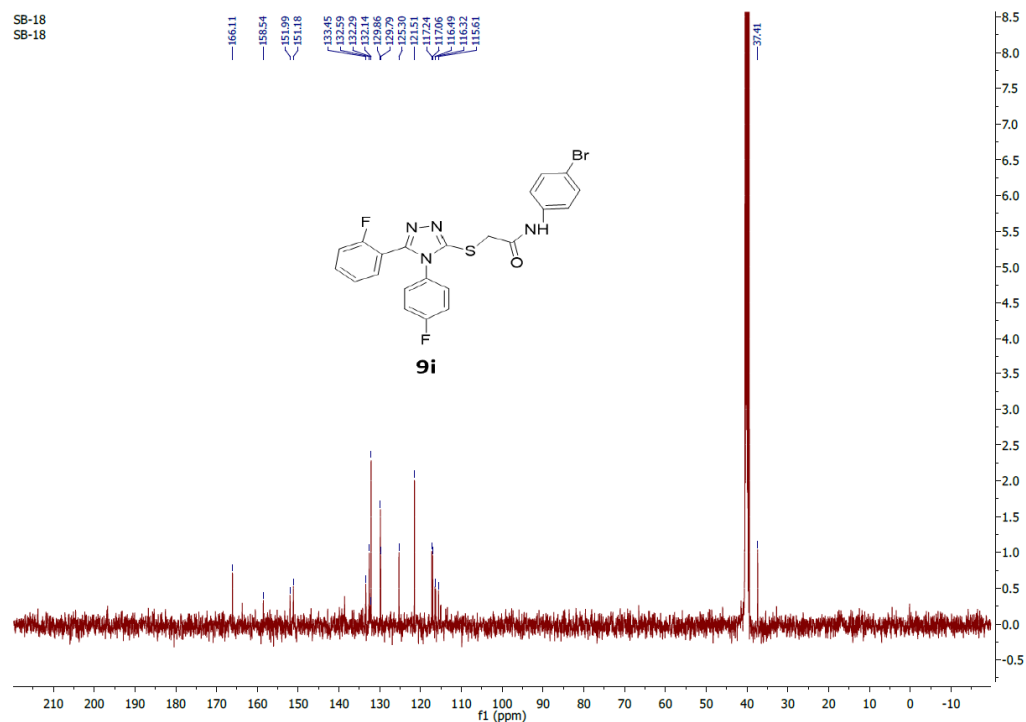

Figure S34, ES†

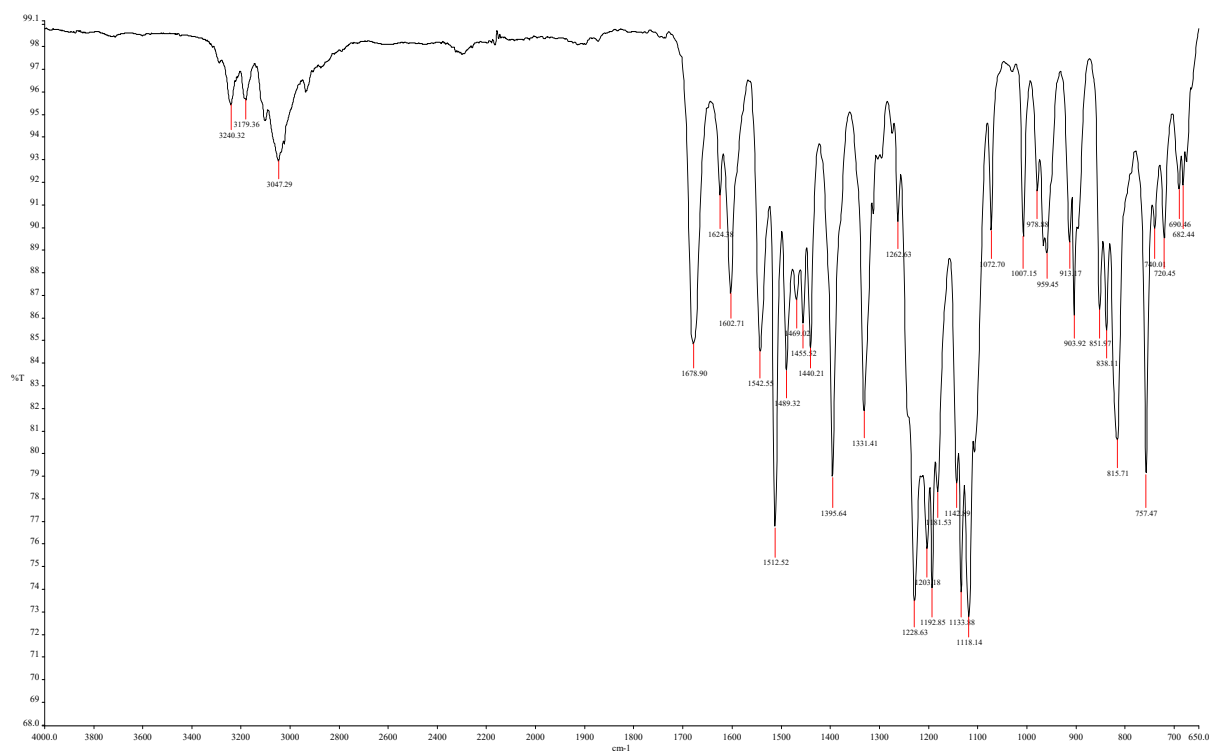

Figure S35, ES†



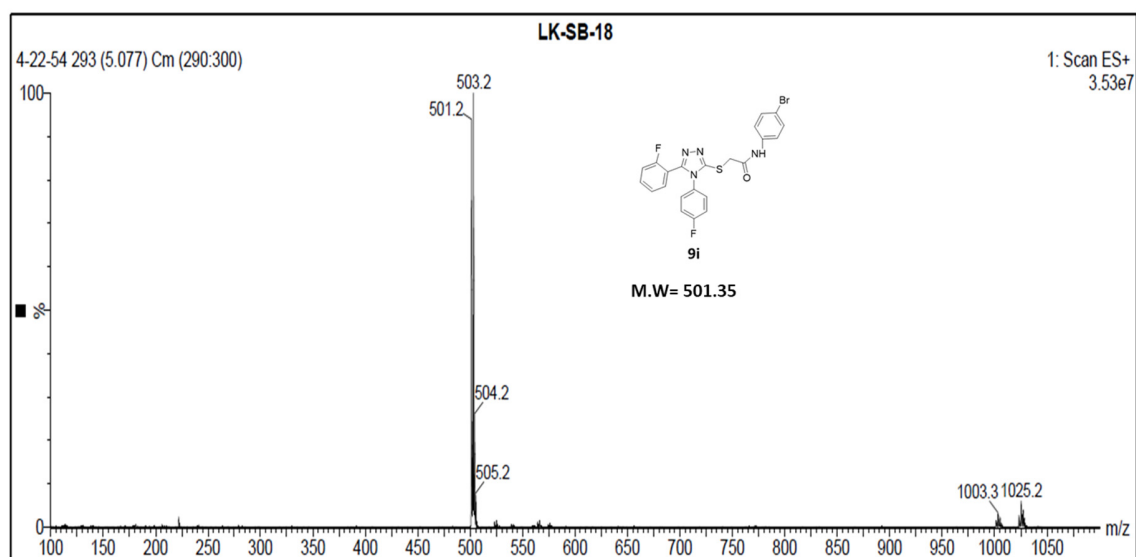

**Figure S36, ES<sup>+</sup>**

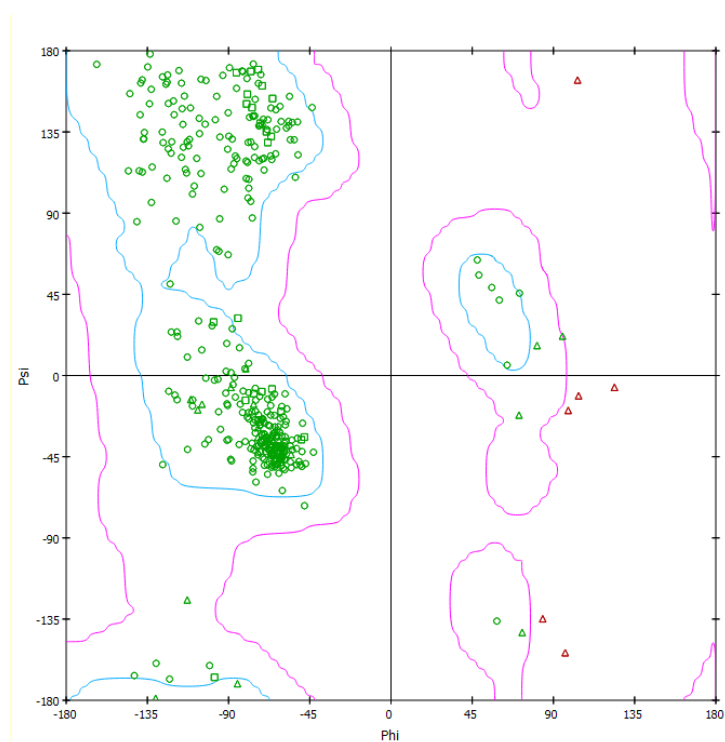

**Figure S37, ES<sup>+</sup>**

9a

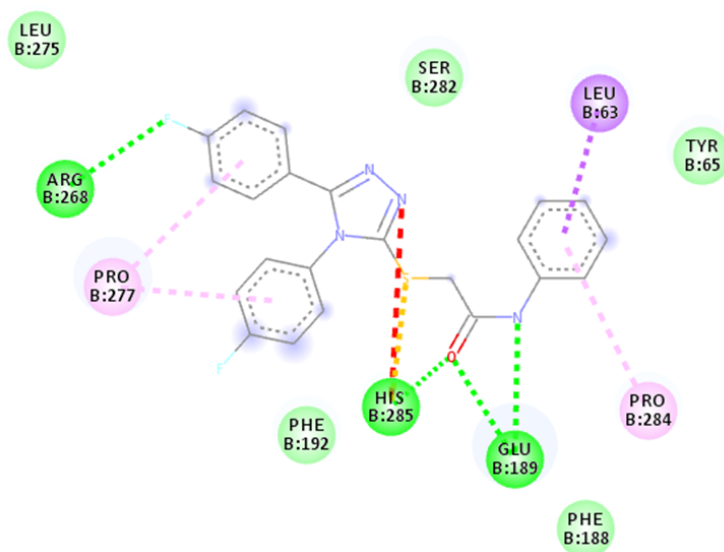

Figure S38, ES‡

9b

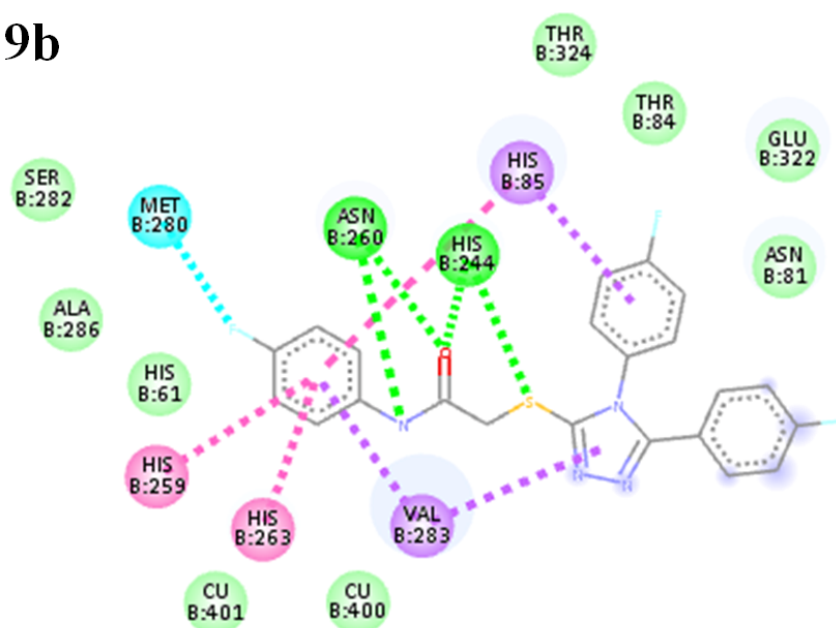

Figure S39, ES‡

9c

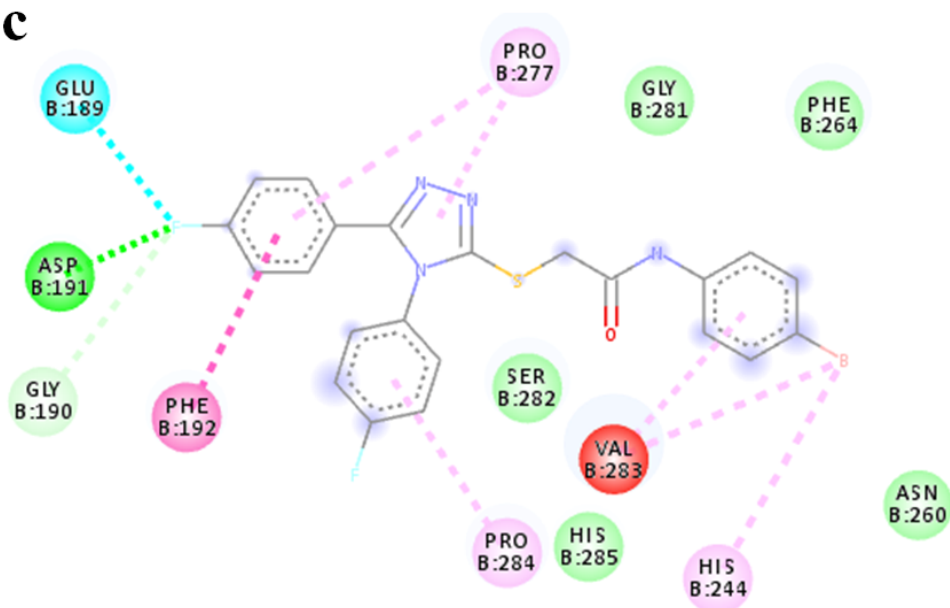

Figure S40, ES‡

9d

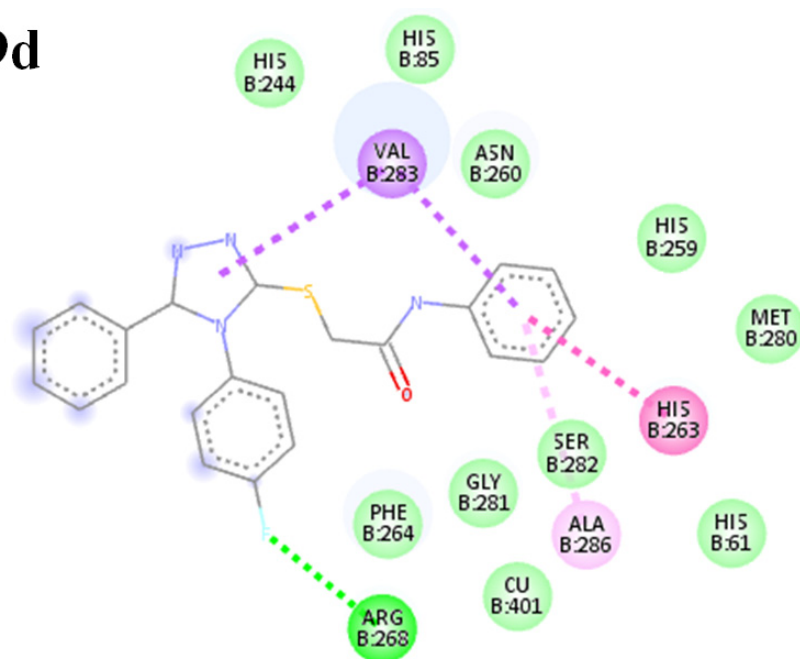

Figure S41, ES‡

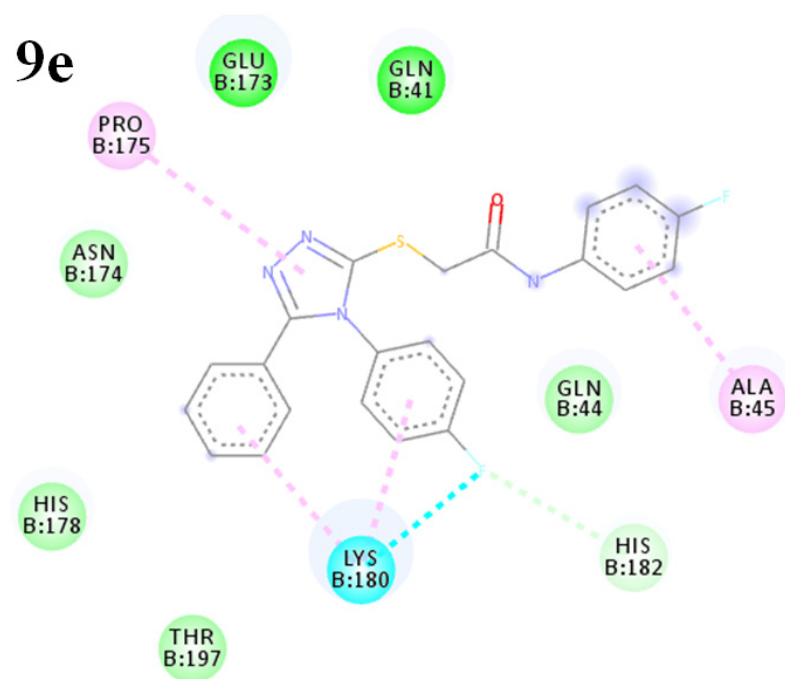

Figure S42, ES‡

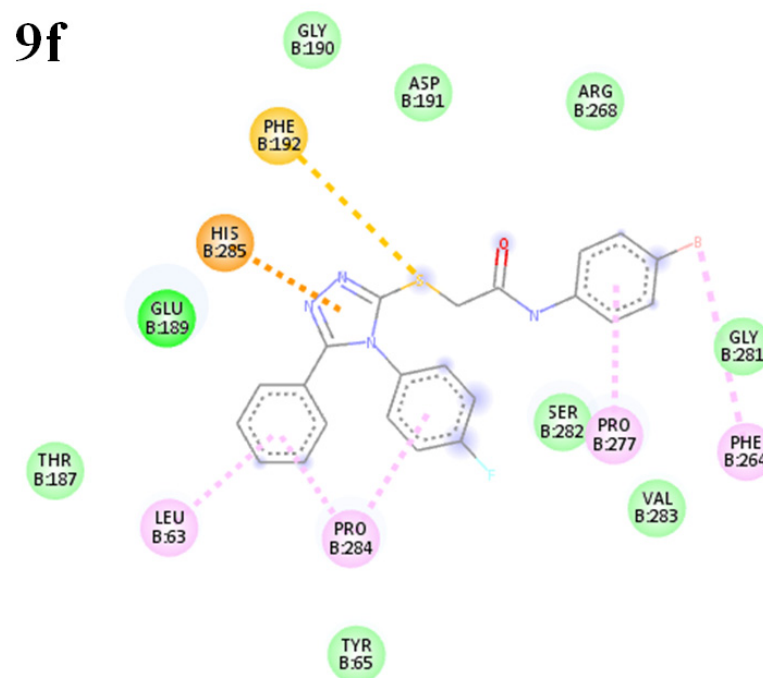

Figure S43, ES‡

9g

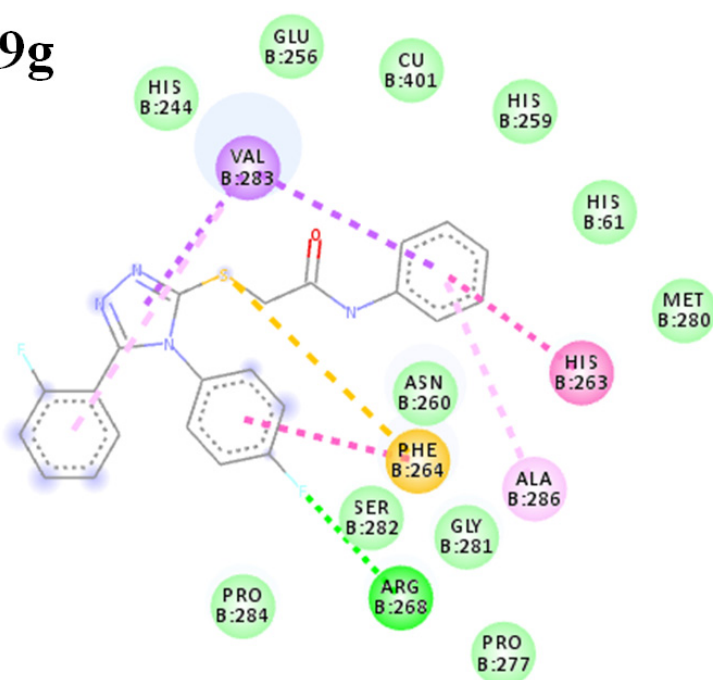

Figure S44, ES‡

9h

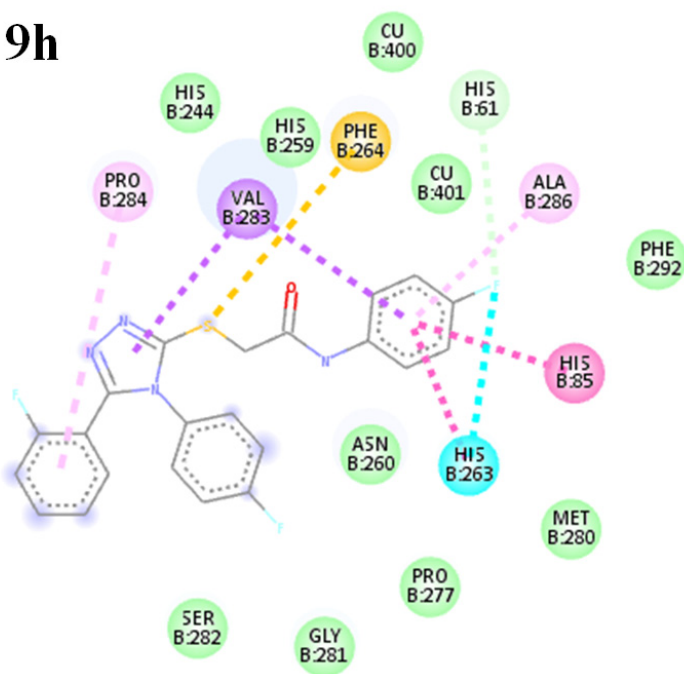

Figure S45, ES‡

9i

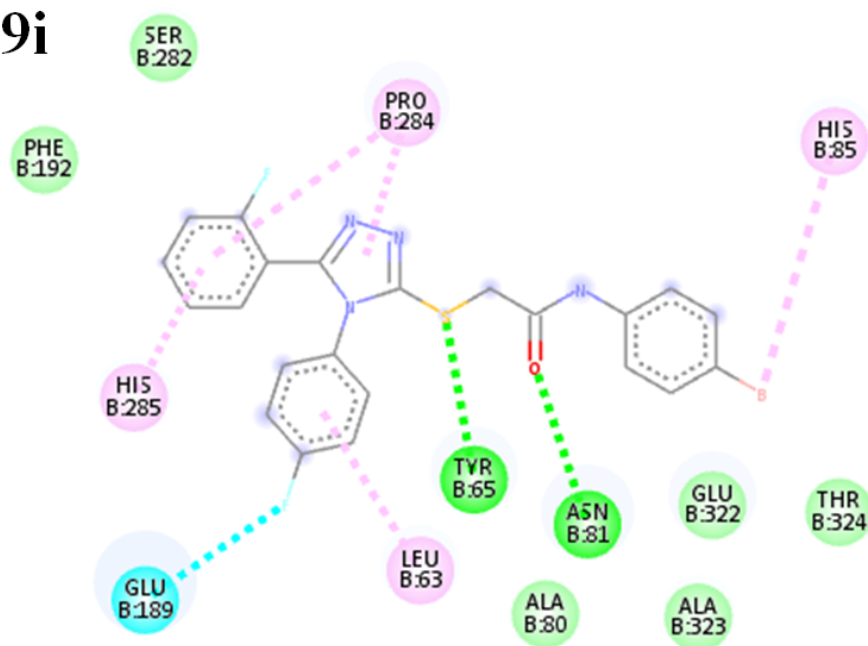

Figure S46, ES‡
